# Supplementary material for: Isolation of Volatile Compounds with Repellent Properties against Aedes albopictus (Diptera: Culicidae) Using CPC Technology
Source: MDPI journal article supplement (doi:10.3390/molecules26113072), 2021-05-21
Supplement: s1 [file s1]

# **Isolation of Volatile Compounds with Repellent Properties against *Aedes albopictus* (Diptera: Culicidae) using CPC technology**

**Anastasia Liakakou<sup>1#</sup>, Apostolis Angelis<sup>1#</sup>, Dimitrios P. Papachristos<sup>2</sup>, Nikolas Fokialakis<sup>1</sup>,  
Antonios Michaelakis<sup>2</sup>, Leandros A. Skaltsounis<sup>1\*</sup>**

<sup>1</sup>Laboratory of Pharmacognosy and Natural Products Chemistry, School of Pharmacy, University of Athens, Panepistimioupoli, Zografou, 15771 Athens

<sup>2</sup>Benaki Phytopathological Institute, Scientific Directorate of Entomology and Agricultural Zoology, 14561, Kifissia;

<sup>#</sup>Equal contribution

<sup>\*</sup>Corresponding authors: Leandros A. Skaltsounis , Email; [skaltsounis@pharm.uoa.gr](mailto:skaltsounis@pharm.uoa.gr)

## Contents

|                    |                                                                                                                                       |
|--------------------|---------------------------------------------------------------------------------------------------------------------------------------|
| <b>Table S1.</b>   | Species, plant parts, weight of extraction material, volume and yield of recovered EOs.                                               |
| <b>Table S2:</b>   | Identified compounds of PNI, PHE, PPI, JTU and JOX essential oils                                                                     |
| <b>Figure S1a:</b> | TIC Chromatogram of PNI                                                                                                               |
| <b>Figure S1b:</b> | TIC Chromatogram of PHE                                                                                                               |
| <b>Figure S1c:</b> | TIC Chromatogram PPI                                                                                                                  |
| <b>Figure S1d:</b> | TIC Chromatogram of JTU                                                                                                               |
| <b>Figure S1e:</b> | TIC Chromatogram of JOX                                                                                                               |
| <b>Figure S2a:</b> | GC-MS chromatograms of upper (A) and lower phases (B) of JOX treated with the biphasic system Hept./ACN/ BuOH 1.6 / 1.6 / 0.2 (v/v/v) |
| <b>Figure S2b:</b> | GC-MS chromatograms of upper (A) and lower phases (B) of PPI treated with the biphasic system Hept./ACN/ BuOH 1.6 / 1.6 / 0.2 (v/v/v) |
| <b>Figure S3:</b>  | TLC chromatograms of CPC fractions from analyses of JOX and PPI essential oils                                                        |

**Table S1.** Information regarding the species, plant parts, weight of extraction material, volume and yield (%v/w of tested materials) of recovered EOs.

| Species                                     | Plant Part | Weight of row material (gr) | Volume of EO (ml) | % v/w |
|---------------------------------------------|------------|-----------------------------|-------------------|-------|
| <i>P. nigra</i> subsp. <i>nigra</i>         | wood       | 141                         | 0.2               | 0.07  |
| <i>P. heldreichii</i>                       | wood       | 88                          | 0.6               | 0.57  |
| <i>P. pinea</i>                             | needles    | 14603                       | 4                 | 0.03  |
| <i>J. turbinata</i>                         | fruits     | 330                         | 6.5               | 1.96  |
| <i>J. oxycedrus</i> subsp. <i>deltoides</i> | fruits     | 251                         | 6.7               | 2.66  |

**Table S2:** Constituents listed in order of elution from a HP-5 MS column. (PNI: *P. nigra* subsp. *nigra*, PHE: *P. heldreichii*, PPI: *P. pinea*, JTU: *J. turbinata*, JOX: *J. oxycedrus* subsp. *deltoides*).

| aConstituents                     | KI   | PNI   | PHE   | PPI   | JTU   | JOX   |
|-----------------------------------|------|-------|-------|-------|-------|-------|
| Tricyclene                        | 921  | -     | -     | -     | 0.48  | -     |
| $\alpha$ -Pinene                  | 930  | 32.82 | 1.49  | 9.50  | 81.72 | 15.65 |
| Camphene                          | 944  | 0.71  | -     | -     | 0.85  | 0.12  |
| Sabinene                          | 966  | 0.12  | -     | 0.59  | 0.52  | 0.21  |
| $\beta$ -Pinene                   | 970  | 0.31  | -     | 3.77  | 2.77  | 1.05  |
| Myrcene                           | 981  | 0.07  | -     | 2.46  | 3.65  | 43.53 |
| $\alpha$ -Phelladrene             | 993  | -     | -     | 0.56  | -     | -     |
| o-Cymene                          | 1019 | 0.38  | -     | -     | -     | -     |
| Limonene                          | 1021 | 1.70  | 3.48  | 45.05 | 1.70  | 4.00  |
| $\beta$ -Phelladrene              | 1024 | -     | -     | 12.79 | 0.16  | -     |
| $\delta$ -3-Carene                | 1027 | -     | -     | -     | 0.21  | -     |
| (E) - $\beta$ - Ocimene           | 1041 | -     | -     | 1.45  | -     | -     |
| Terpinolene                       | 1079 | -     | -     | 0.70  | -     | 0.87  |
| Nonanal                           | 1092 | 0.50  | -     | -     | -     | -     |
| $\alpha$ -Fenchol                 | 1108 | 1.02  | -     | -     | -     | -     |
| $\alpha$ -Campholenal             | 1120 | 2.26  | -     | -     | 0.37  | -     |
| <i>cis</i> - $\beta$ -Terpineol   | 1136 | -     | 47.41 | -     | -     | -     |
| Camphen hydrate                   | 1140 | 0.41  | -     | -     | -     | -     |
| <i>trans</i> - $\beta$ -Terpineol | 1151 | -     | 6.56  | -     | -     | -     |
| Pinocarvone                       | 1152 | 1.12  | -     | -     | -     | -     |
| p-Mentha1,5diene-8ol              | 1162 | 0.89  | -     | -     | -     | -     |
| Terpinene4ol                      | 1165 | 0.86  | -     | -     | 0.21  | 0.23  |
| $\alpha$ -Terpineol               | 1177 | -     | 9.19  | -     | 0.58  | -     |
| Verbenone                         | 1199 | 0.08  | -     | -     | 0.55  | -     |
| Carveol <i>trans</i>              | 1211 | -     | -     | -     | -     | -     |

|                                      |      |      |       |      |      |       |
|--------------------------------------|------|------|-------|------|------|-------|
| Carvone                              | 1237 | 0.18 | -     | -    | -    | -     |
| Bornyl acetate                       | 1276 | -    | -     | -    | -    | 0.24  |
| Azulene                              | 1289 | 0.18 | -     | -    | -    | -     |
| $\delta$ -Elemene                    | 1327 | -    | -     | 0.51 | -    | -     |
| $\alpha$ -Terpinyl acetate           | 1339 | -    | -     | -    | 0.27 | -     |
| $\alpha$ -Cubebene                   | 1340 | 0.07 | -     | -    | -    | 0.22  |
| Citronellyl acetate                  | 1342 | -    | -     | -    | -    | 0.20  |
| $\alpha$ -Longipinene                | 1343 | -    | 0.77  | -    | -    | -     |
| Longicyclene                         | 1361 | -    | 0.18  | -    | -    | -     |
| $\alpha$ -Ylangene                   | 1362 | 0.53 | -     | -    | -    | -     |
| $\alpha$ -Copaene                    | 1364 | 1.06 | -     | -    | -    | 0.43  |
| Geranyl acetate                      | 1370 | -    | -     | -    | -    | 0.46  |
| $\beta$ -Bourbonene                  | 1378 | 1.14 | -     | -    | -    |       |
| $\beta$ -Elemene                     | 1379 | -    | -     | -    | 0.15 | 0.12  |
| Longifolene                          | 1399 | -    | 11.88 | 1.12 | -    | -     |
| $\beta$ -Caryophyllene               | 1410 | 0.28 | -     | 6.40 | 0.99 | 1.76  |
| $\beta$ -Copaene                     | 1423 | 0.59 | -     | -    | -    | 0.10  |
| $\alpha$ -Guaiene                    | 1430 | -    | -     | 0.30 | -    |       |
| Z- $\beta$ -Farnesene                | 1434 | -    | -     | -    | -    | 0.36  |
| $\alpha$ -Humulene                   | 1442 | -    | -     | 1.12 | 0.53 | 1.58  |
| $\gamma$ -Muurolene                  | 1468 | 4.93 | -     | -    | -    | 0.32  |
| $\alpha$ -Amorphene                  | 1474 | 0.35 | -     | -    | -    |       |
| Germacrene D                         | 1475 | 0.61 | -     | 3.29 | -    | 23.77 |
| $\beta$ -Selinene                    | 1487 | -    | 0.77  | -    | -    | -     |
| $\delta$ -Selinene                   | 1490 | -    | -     | 3.29 | -    | -     |
| <i>trans</i> -Muurola 4 (14) 5 diene | 1492 | -    | -     | -    | 2.40 | -     |
| $\gamma$ -Amorphene                  | 1489 | 1.06 | -     | -    | -    | -     |
| $\alpha$ -Selinene                   | 1490 | -    | 0.21  | -    | -    | -     |
| $\alpha$ -Muurolene                  | 1499 | 1.11 | -     | -    | 0.08 | 0.46  |
| $\delta$ -Amorphene                  | 1505 | 0.17 | -     | -    | -    | -     |
| $\gamma$ -Cadinene                   | 1505 | 2.54 | -     | -    | -    | 0.26  |
| $\delta$ -Cadinene                   | 1514 | 5.23 | -     | 0.73 | -    | 2.74  |
| <i>trans</i> -Calamenene             | 1518 | 1.04 | -     | -    | -    | -     |
| $\alpha$ -Cadinene                   | 1530 | 0.31 | -     | -    | -    | -     |
| $\alpha$ -Calacorene                 | 1539 | 0.66 | -     | -    | -    | -     |
| $\beta$ -Calacorene                  | 1557 | 0.28 | -     | -    | -    | -     |
| Guaiol                               | 1593 | -    | -     | 4.25 | -    | -     |
| 1-epi Cubenol                        | 1612 | 0.56 | -     | -    | -    | -     |
| epi- $\alpha$ -Murrolol              | 1632 | 0.68 | -     | -    | -    | -     |
| $\alpha$ -Cadinol                    | 1644 | 1.77 | -     | -    | -    | -     |
| Cadalene                             | 1669 | 0.81 | -     | -    | -    | -     |

|                           |      |       |      |       |       |       |
|---------------------------|------|-------|------|-------|-------|-------|
| Cembrene                  | 1929 | -     | 6.26 | -     | -     | -     |
| (3E)-Cembrene A           | 1943 | -     | 0.59 | -     | -     | -     |
| Thunbergol                | 2057 |       | 9.61 |       |       |       |
| Sandaracopimarinal        | 2172 | 18.10 | -    | -     | -     | -     |
| Sandaracopimarinol        | 2268 | 3.45  | -    | -     | -     | -     |
| Abietal                   | 2300 | 1.17  | -    | -     | -     | -     |
| Total identified (%)      |      | 92.11 | 98.4 | 97.88 | 98.19 | 98.68 |
| Total number of compounds |      | 43    | 13   | 18    | 19    | 23    |

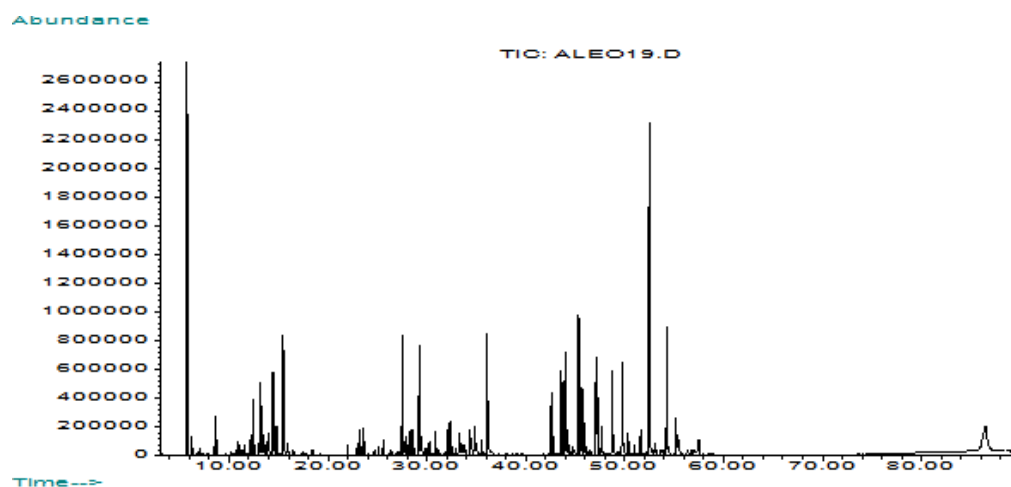

**Figure S1a:** TIC Chromatogram of *Pinus nigra* subsp. *nigra* (wood)

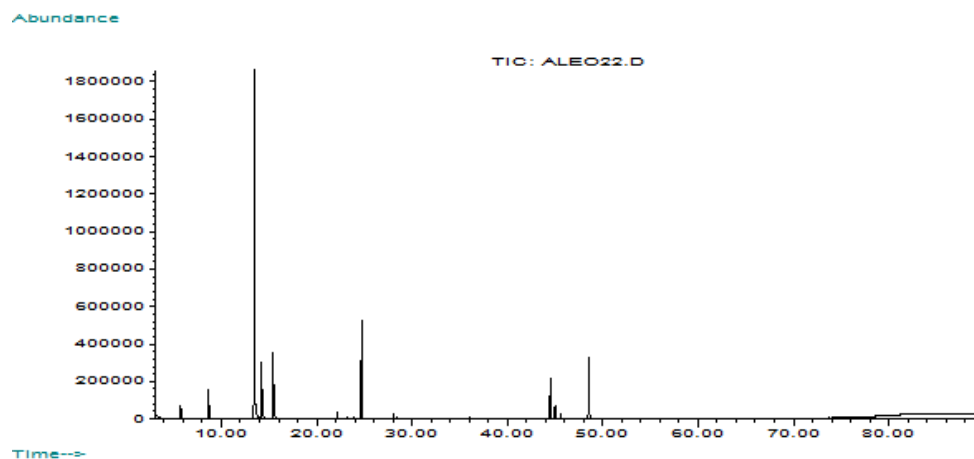

**Figure S1b:** TIC Chromatogram of *Pinus heldreichii* (wood)

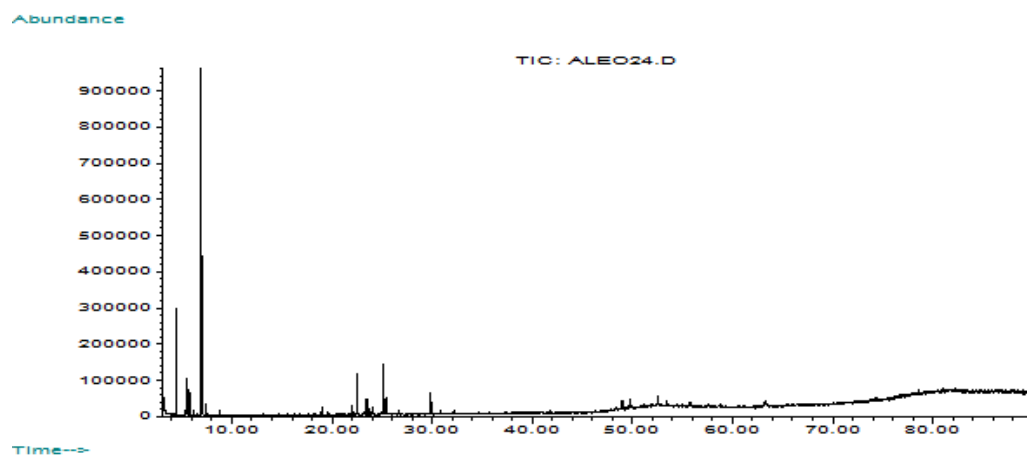

Figure S1c: TIC Chromatogram *Pinus pinea* (needles)

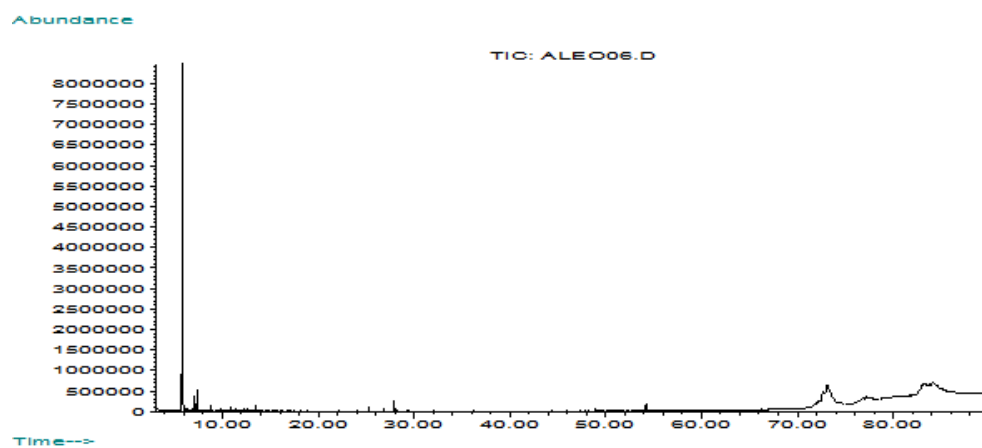

Figure S1d: TIC Chromatogram of *Juniperus turbinata* (fruits)

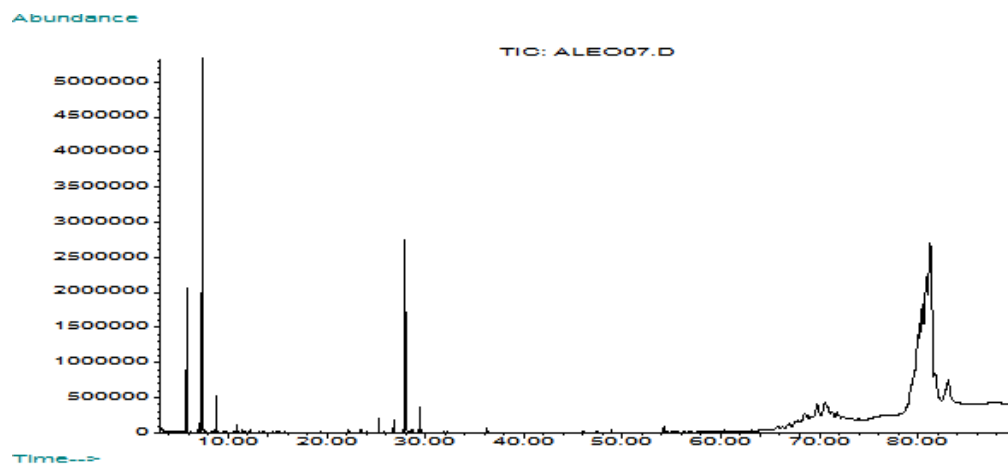

Figure S1e: TIC Chromatogram of *Juniperus oxycedrus* subsp. *deltooides* (fruits)

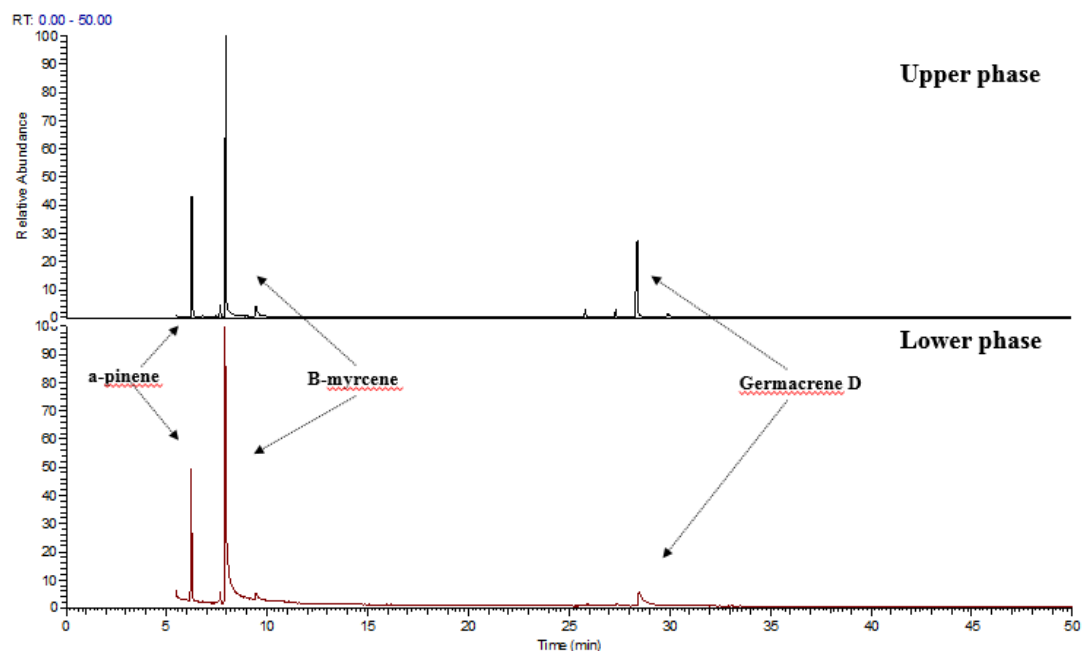

Figure S2a: Upper (A) and lower phase (B) GC-MS chromatograms obtained from *J. oxycedrus* subsp. *deltooides* essential oil with Heptane / Acetonitrile / Butanol biphasic system 1.6 / 1.6 / 0.2 v

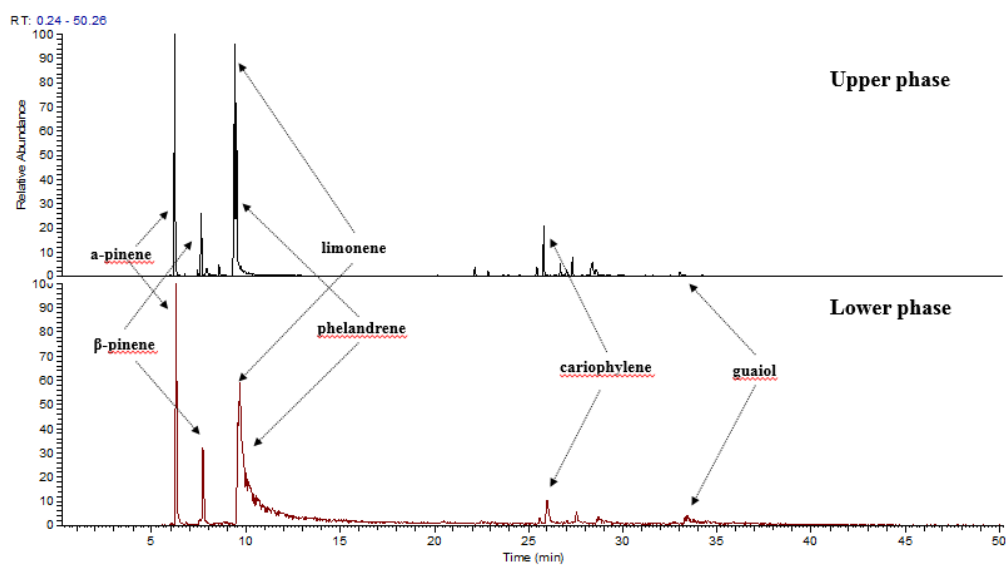

Figure S2b: Upper (A) and lower phase (B) GC-MS chromatograms obtained from *P. pinea* essential oil with Heptane / Acetonitrile / Butanol biphasic system 1.6 / 1.6 / 0.2 v

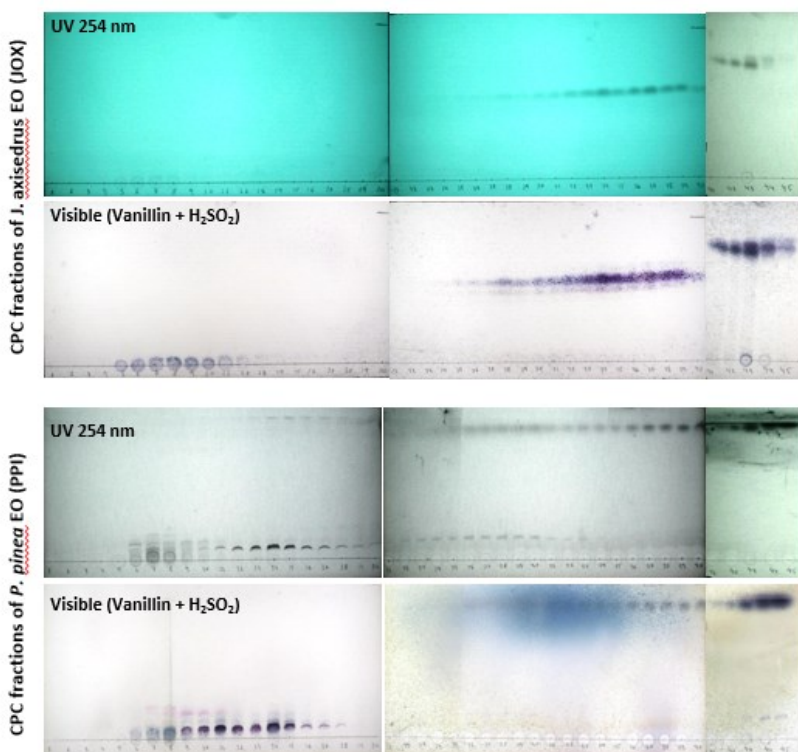

**Figure S3:** TLC chromatograms of fractions from CPC analyses of the essential oils of *J. oxycedrus* subsp. *deltoides* (upper) and *P. pinea* (lower) observation at UV-254 nm and visible after spraying with vanillin sulfate solution and heating
